# Supplementary material
Source: PubMed Central journal article supplement (PMC6957074)

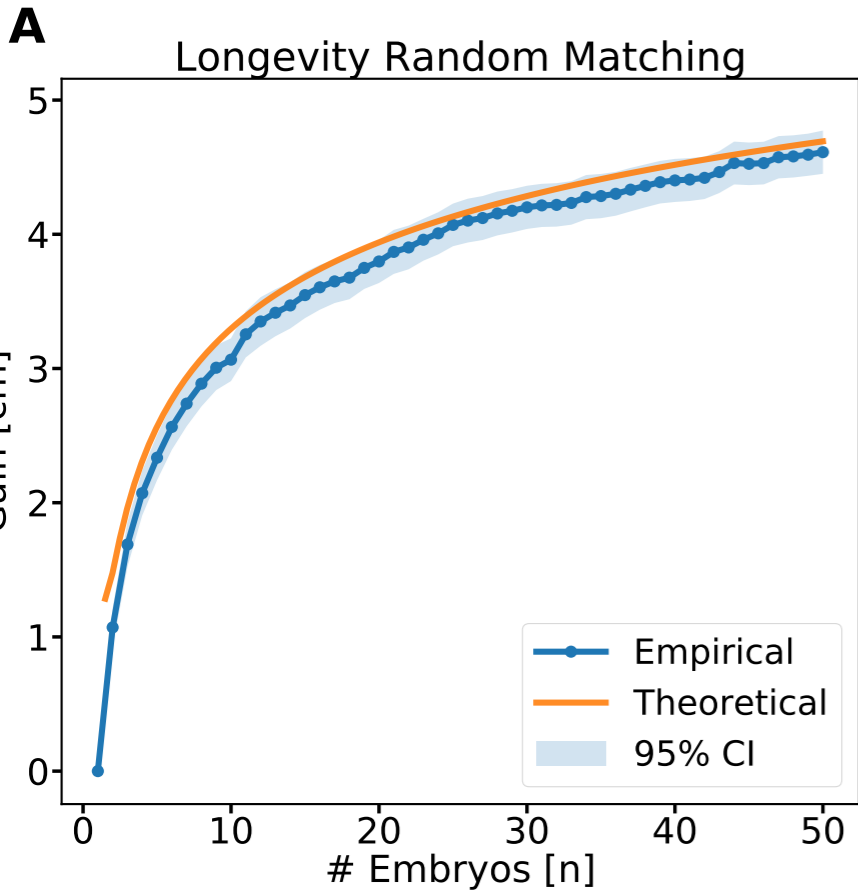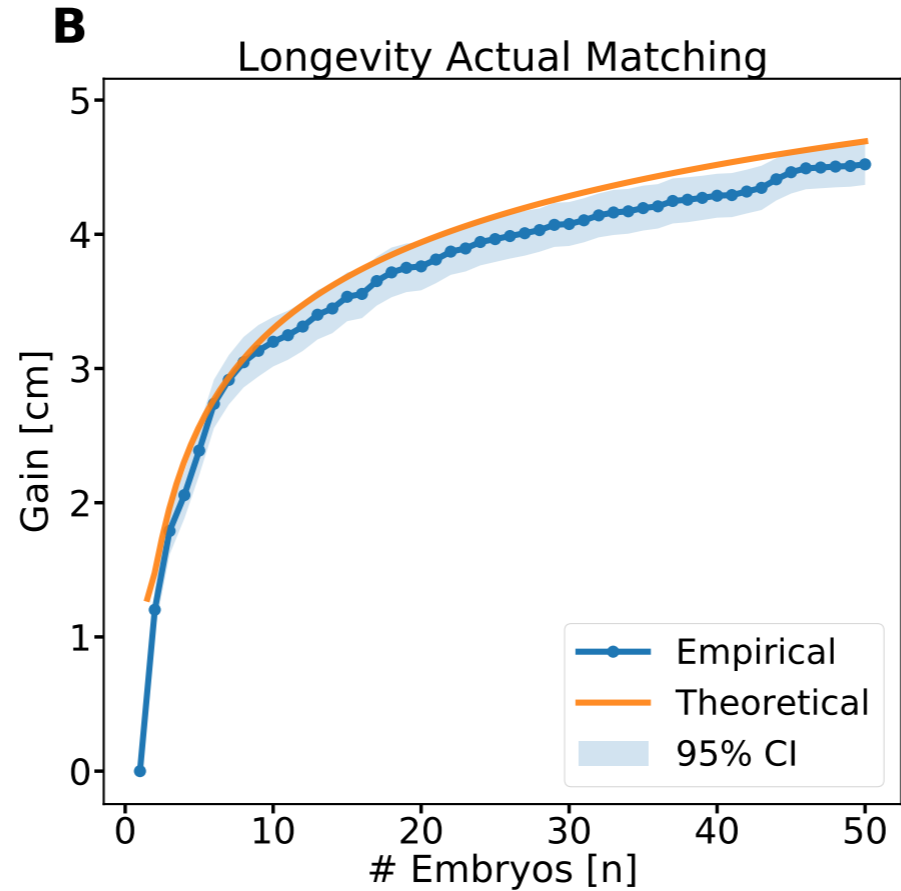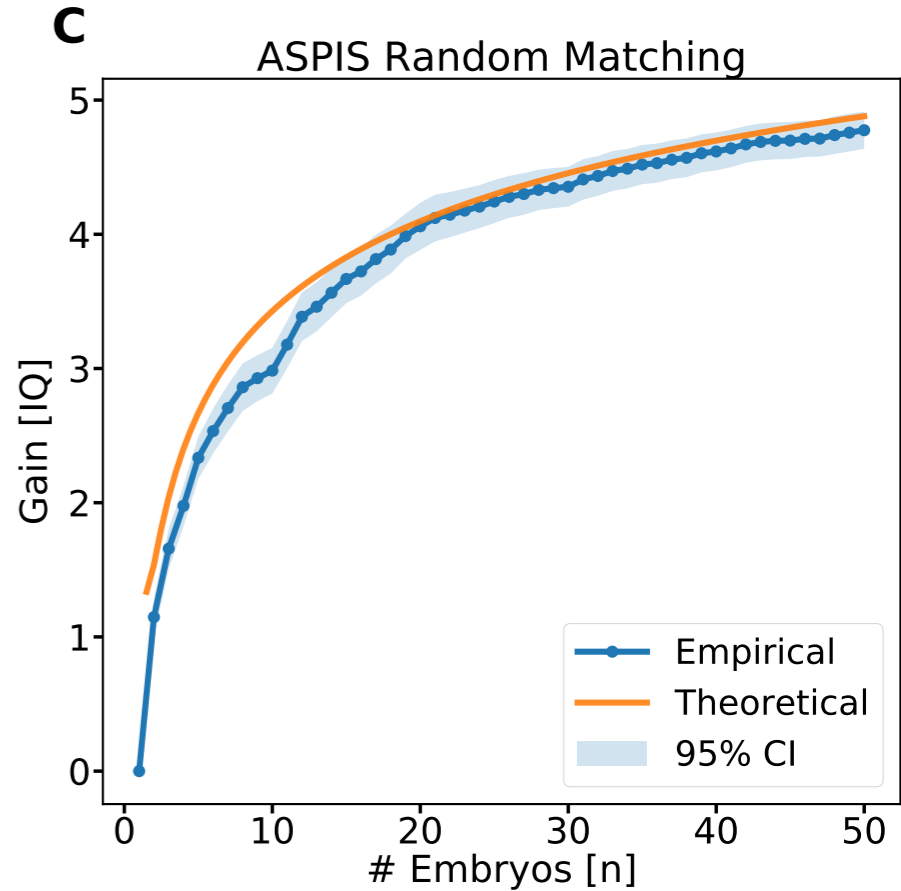

Supplement: NIHMS1542055-supplement-2.pdf [file NIHMS1542055-supplement-2.pdf]

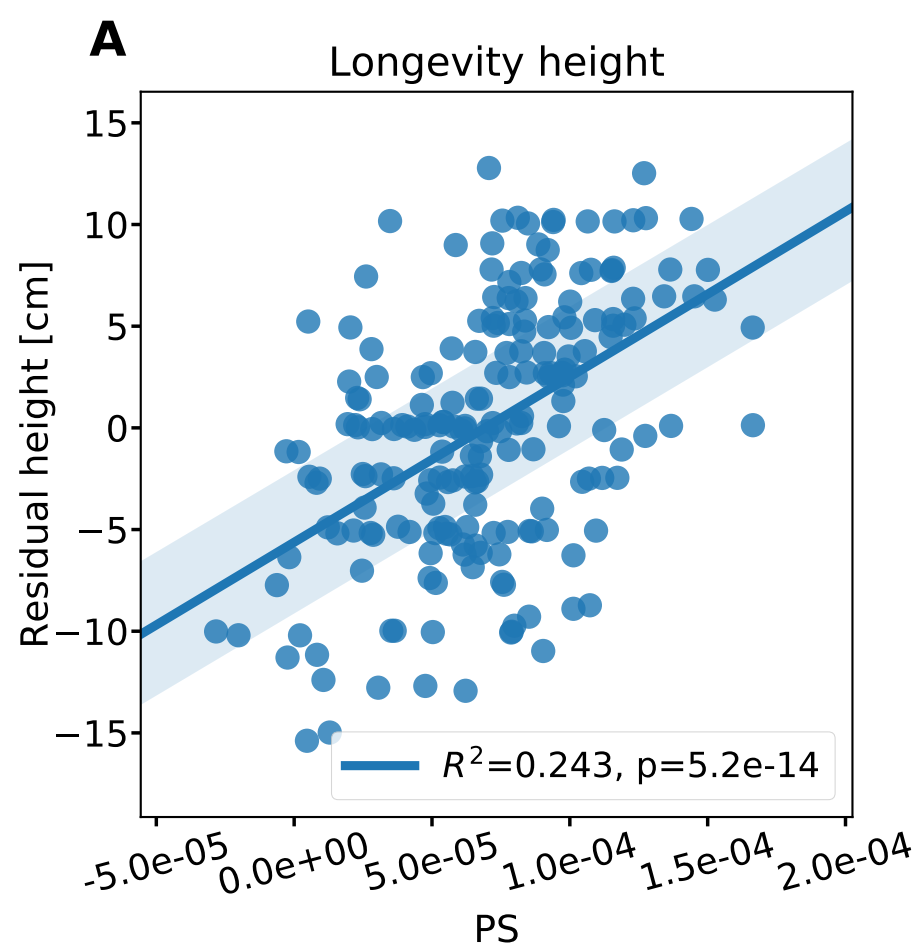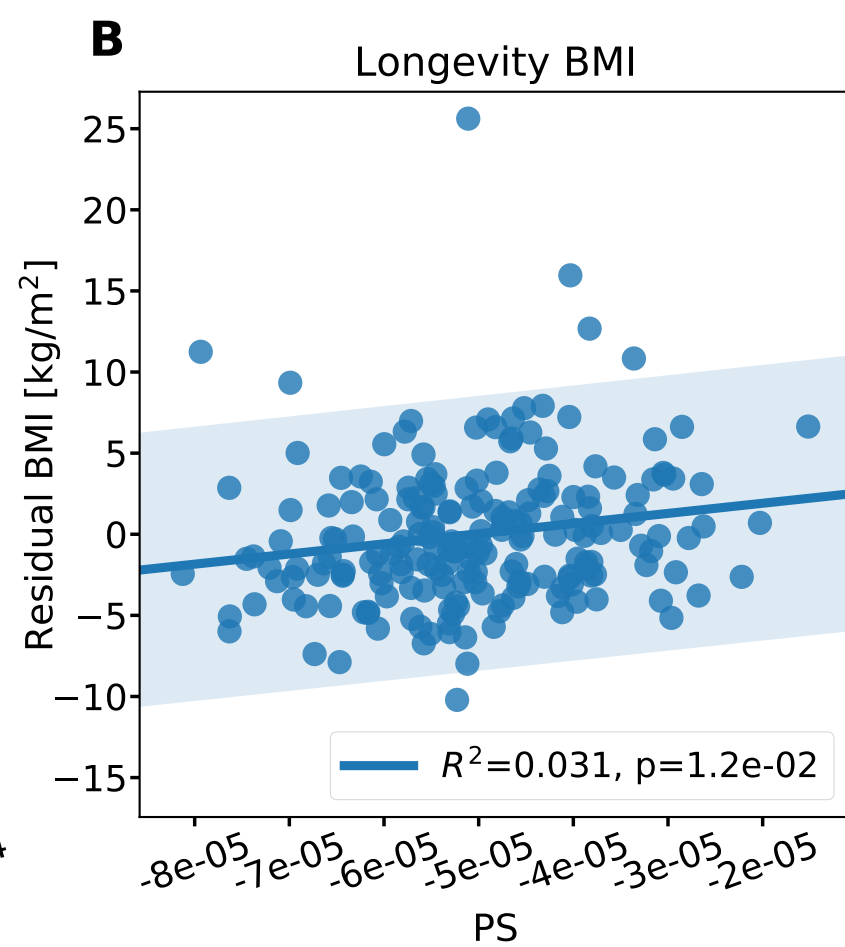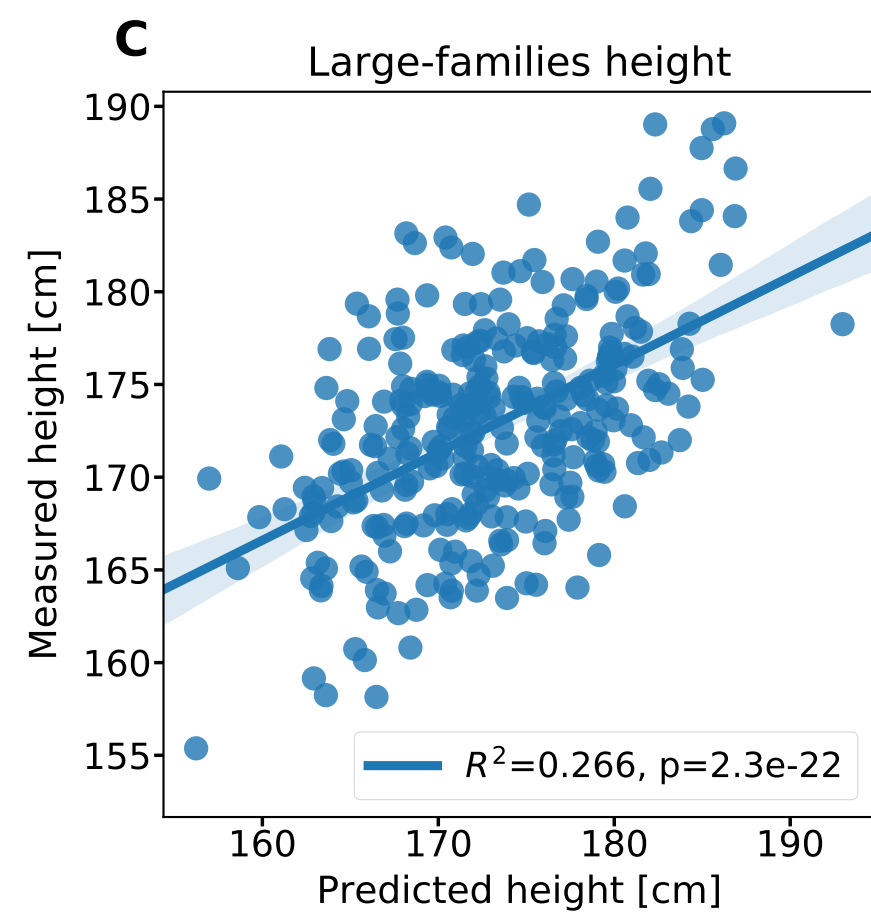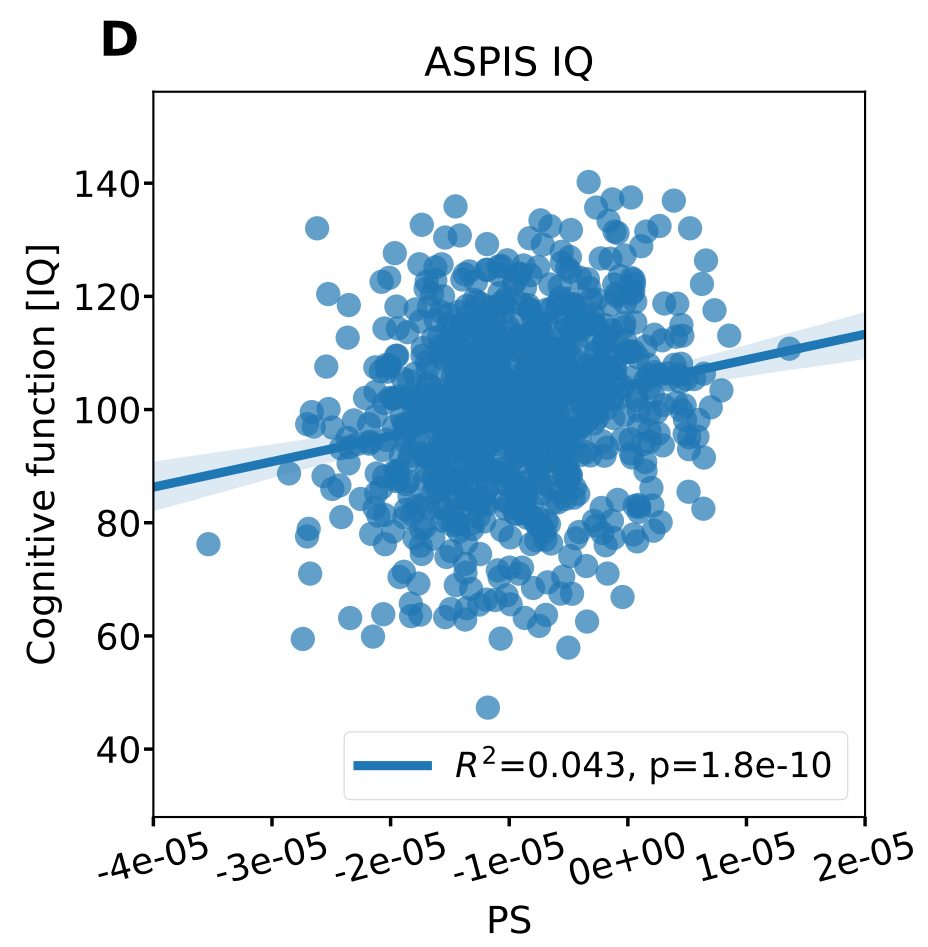

Supplement: NIHMS1542055-supplement-5.pdf [file NIHMS1542055-supplement-5.pdf]
